# Supplementary material
Source: MDPI journal article supplement (https://www.mdpi.com/2073-4352/11/7/835)
Supplement: s1 [file s1]

## Supporting Information

**Tetrabromoethane as  $\sigma$ -hole donor toward bromide ligands: halogen bonding between  $\text{C}_2\text{H}_2\text{Br}_4$  and bromide dialkylcyanamide platinum(II) complexes**

Anna M. Cheranyova<sup>1</sup>, Daniil M. Ivanov<sup>1</sup>

<sup>1</sup>Institute of Chemistry, Saint Petersburg State University, Universitetskaya Nab. 7/9, 199034  
Saint Petersburg, Russian Federation

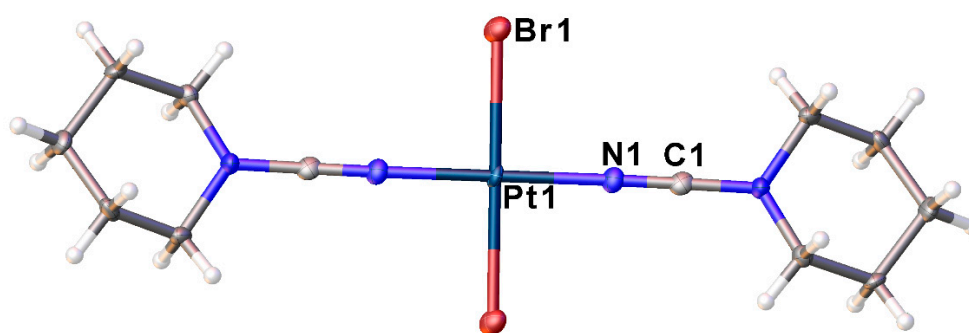

**Figure S1.** Structure of complex *trans*-[PtBr<sub>2</sub>(NCN(CH<sub>2</sub>)<sub>5</sub>)<sub>2</sub>]

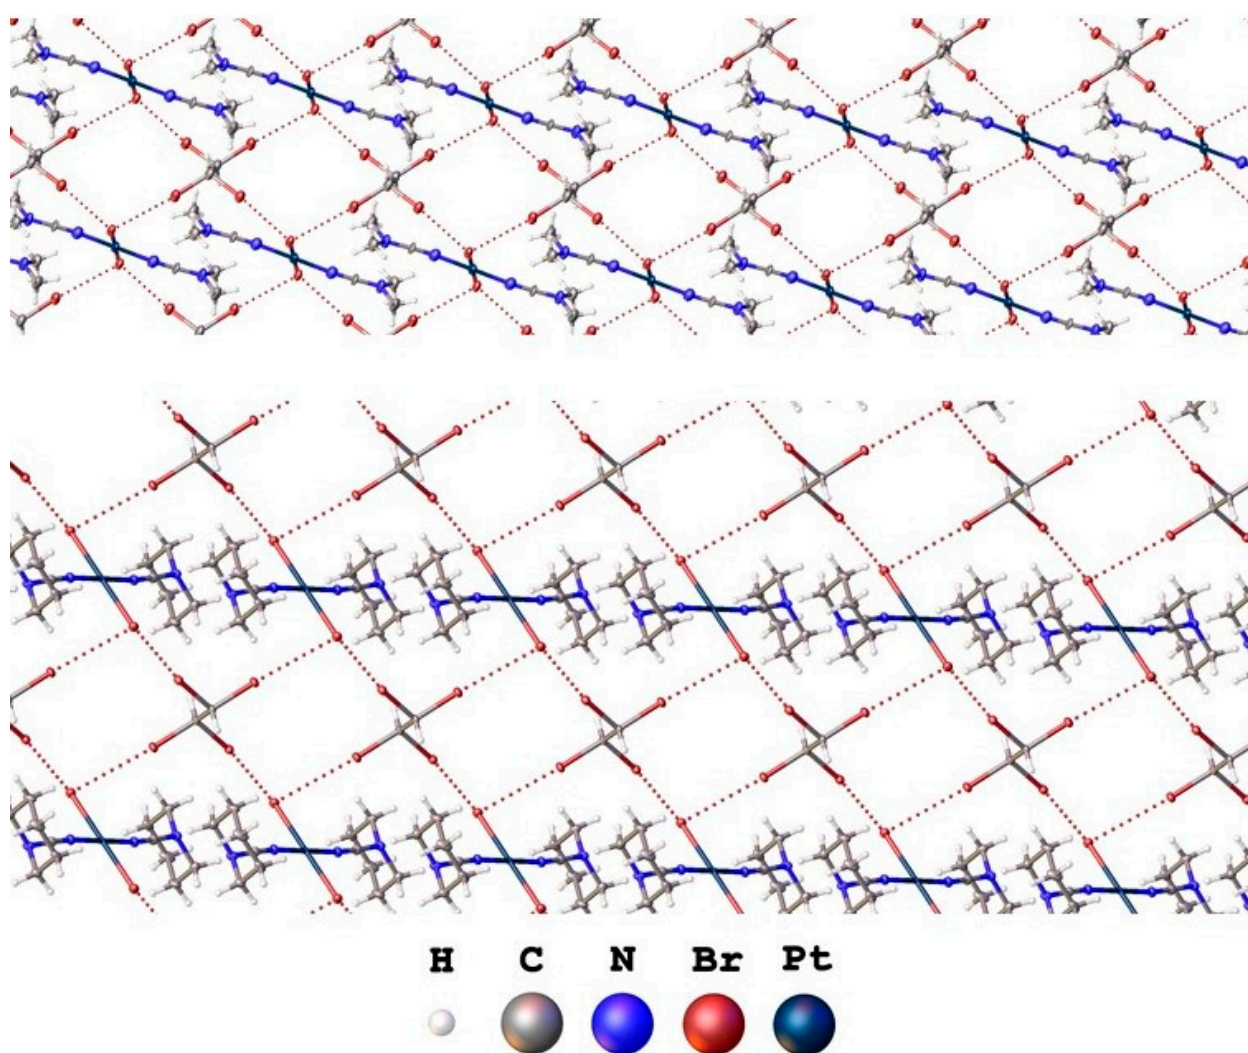

**Figure S2.** Formation of 2D polymer networks in adducts **1·tbe** (top) and **2·tbe** (bottom).

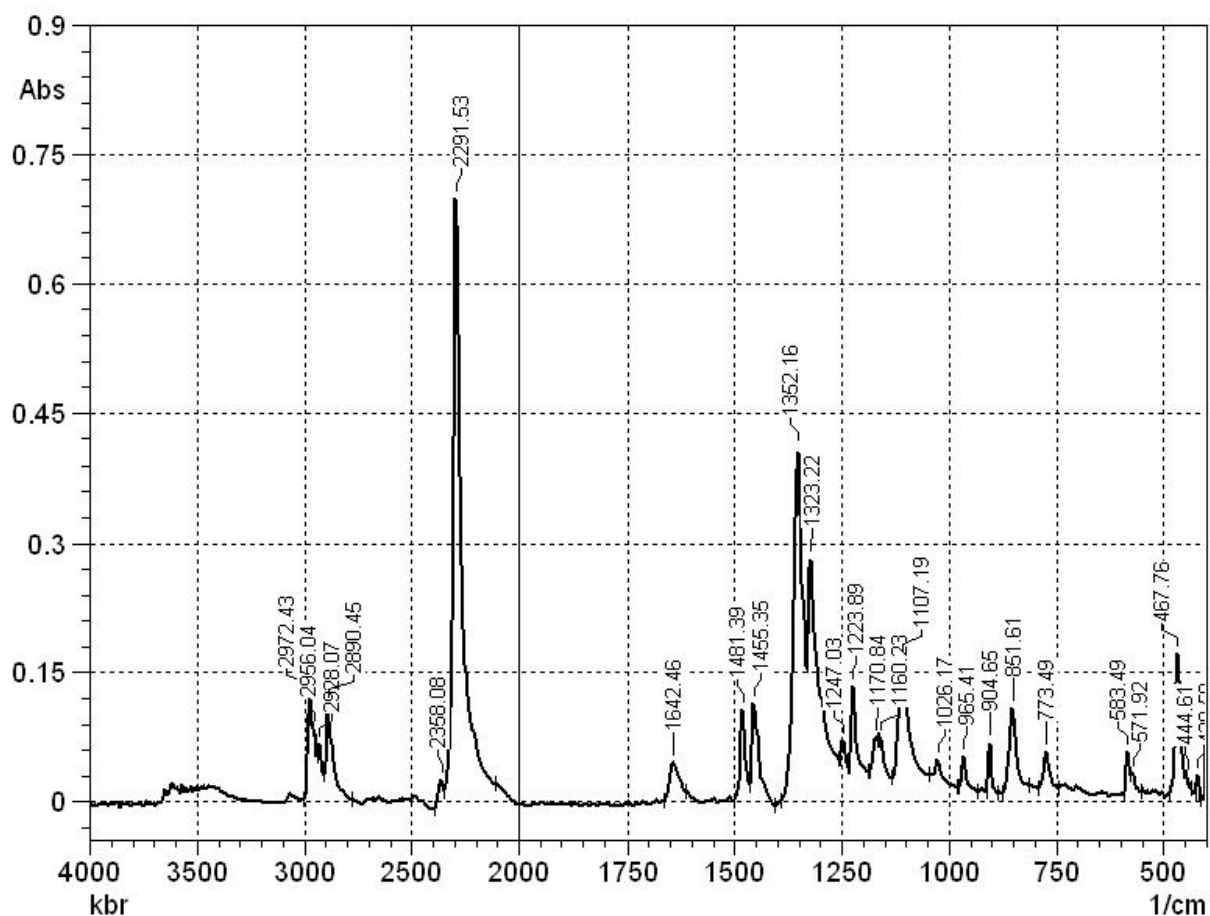

**Figure S3.** IR-spectra of complex *trans*-[PtBr<sub>2</sub>(NCN(CH<sub>2</sub>)<sub>5</sub>)<sub>2</sub>]: 2944 (w), 2852 (w),  $\nu$ (C–H); 2291 (s),  $\nu$ (C $\equiv$ N); 1170 (w), 1107 (w),  $\nu$ (C–N); 467 (m),  $\nu$ (Pt–N).

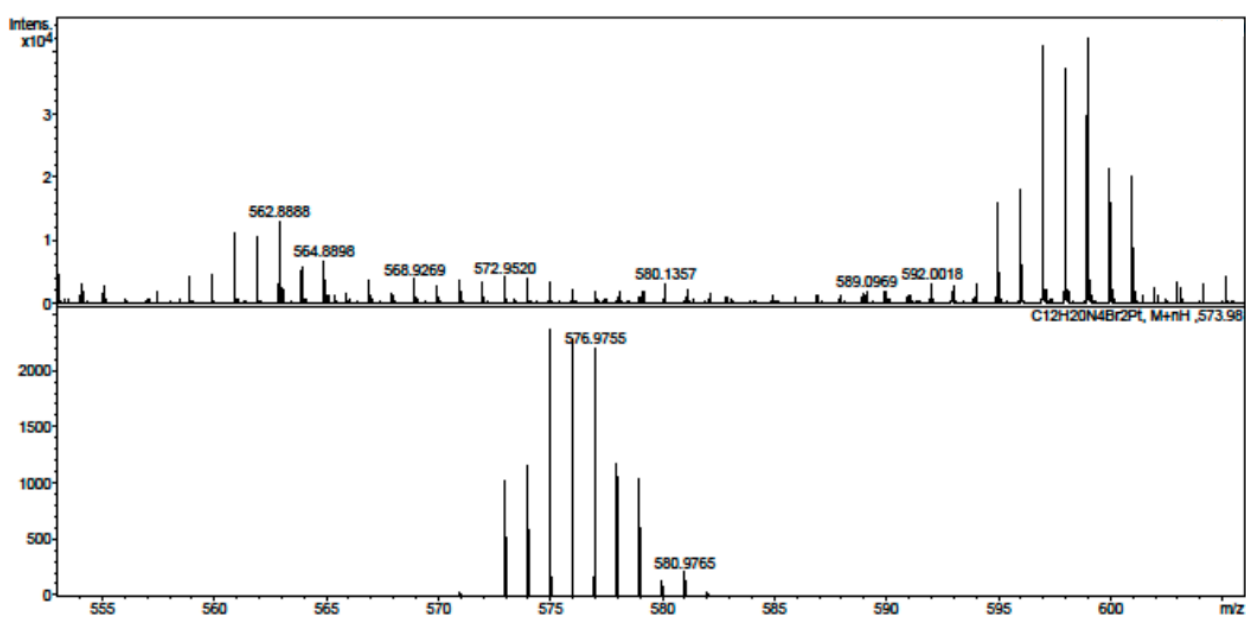

**Figure S4.** Mass spectrum of complex *trans*-[PtBr<sub>2</sub>(NCN(CH<sub>2</sub>)<sub>5</sub>)<sub>2</sub>]

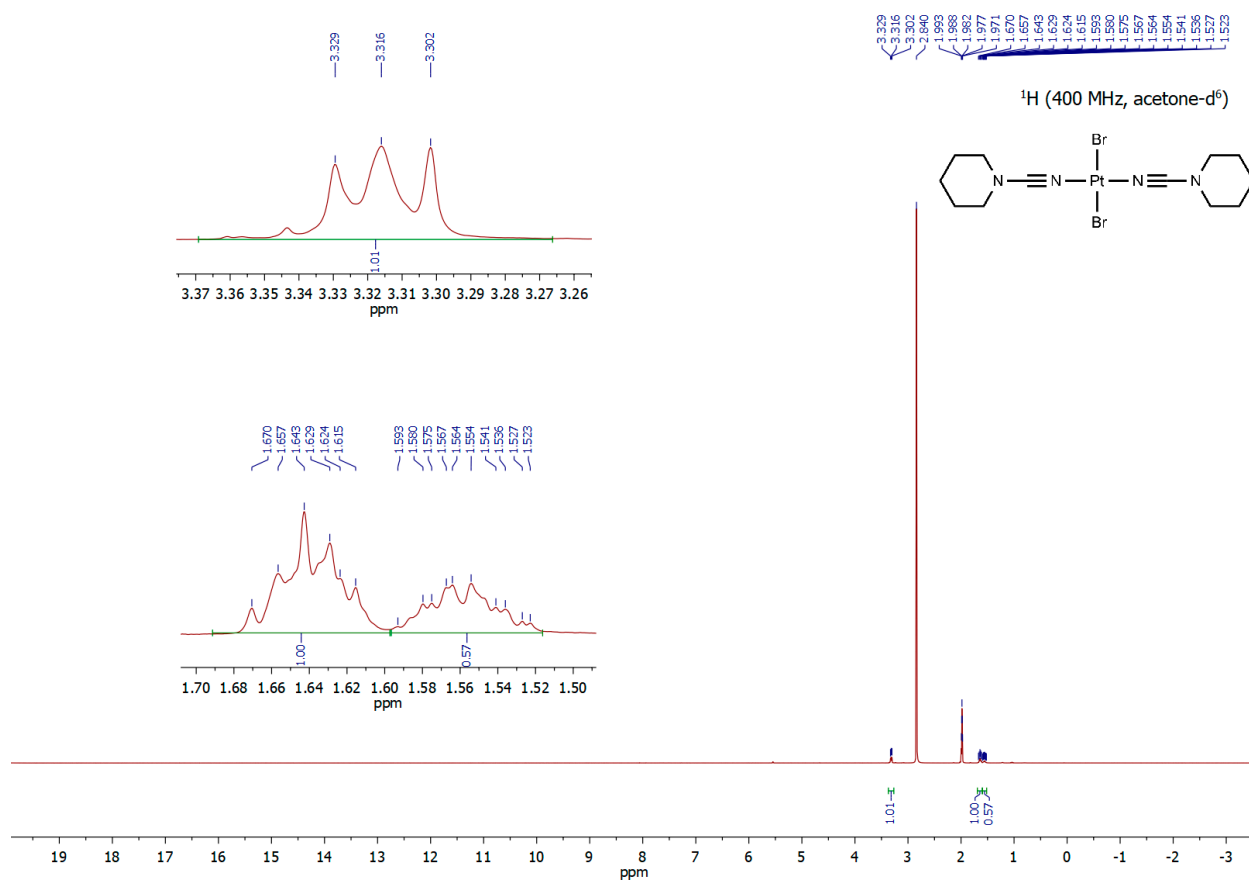

**Figure S5.** <sup>1</sup>H NMR spectrum of complex *trans*-[PtBr<sub>2</sub>(NCN(CH<sub>2</sub>)<sub>5</sub>)<sub>2</sub>]

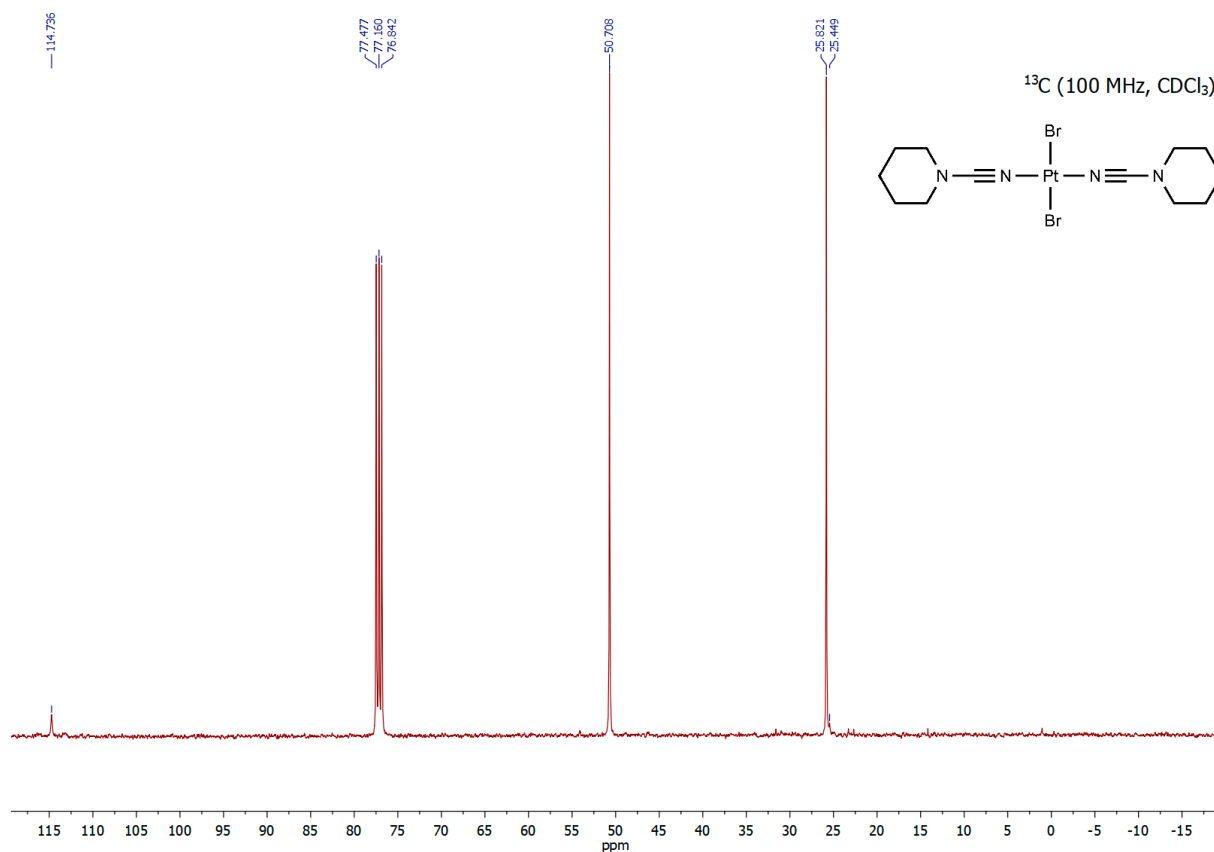

**Figure S6.** <sup>13</sup>C{<sup>1</sup>H} NMR spectrum of complex *trans*-[PtBr<sub>2</sub>(NCN(CH<sub>2</sub>)<sub>5</sub>)<sub>2</sub>]

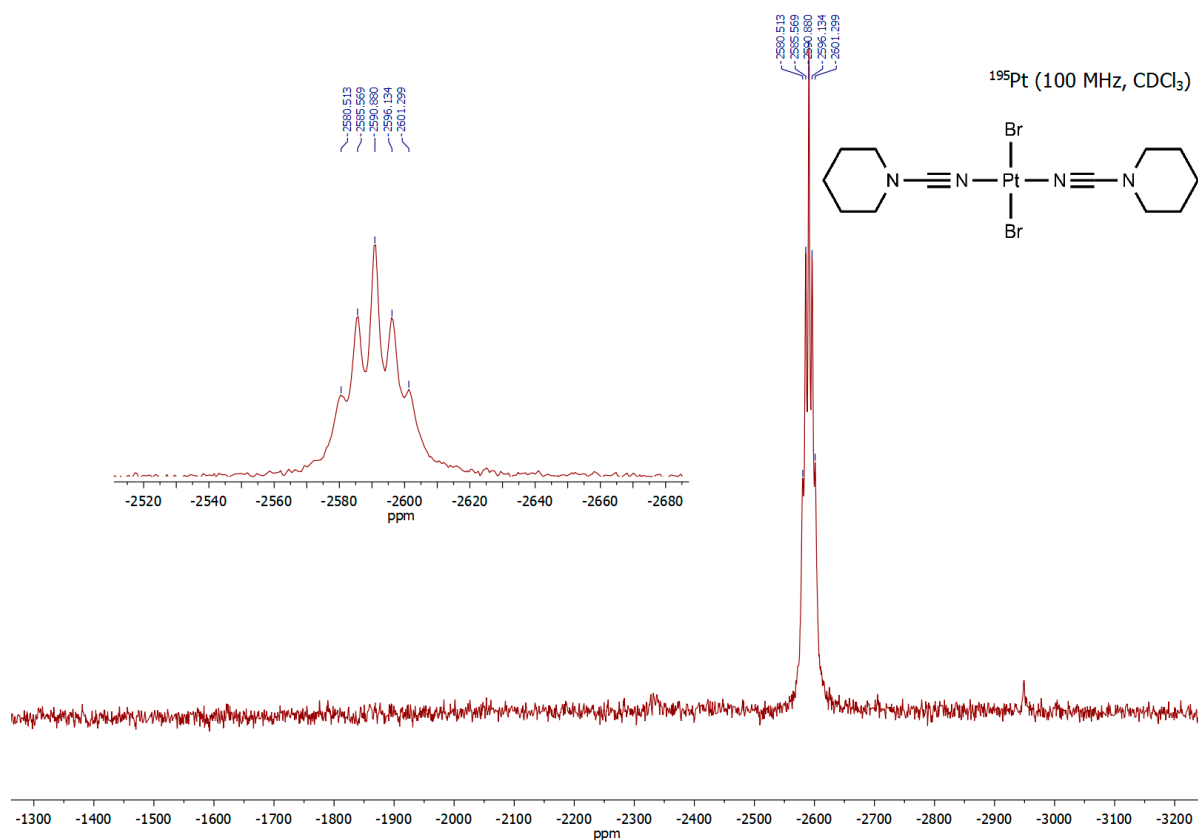

**Figure S7.** <sup>195</sup>Pt NMR spectrum of complex *trans*-[PtBr<sub>2</sub>(NCN(CH<sub>2</sub>)<sub>5</sub>)<sub>2</sub>]

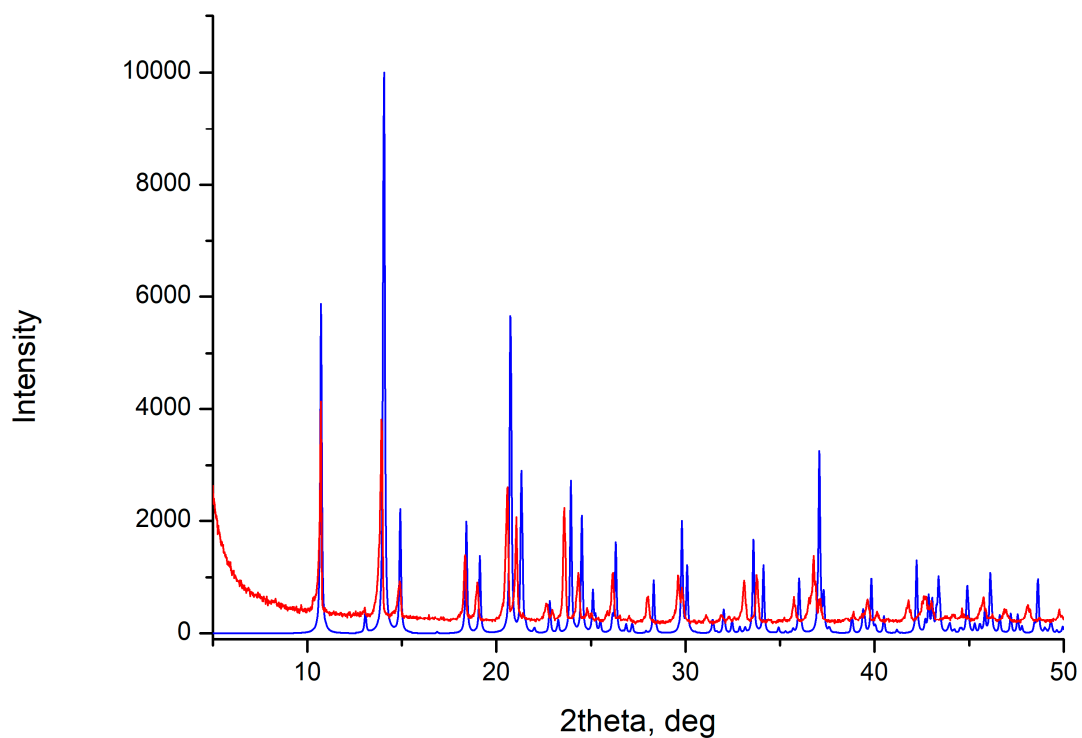

**Figure S8.** Comparison of PXRD (red line) and XRD (blue line) complex *trans*-[PtBr<sub>2</sub>(NCN(CH<sub>2</sub>)<sub>5</sub>)<sub>2</sub>]. The phases coincide, the difference is due to different experimental conditions (for PXRD - RT, for XRD - 100 K)

**Table S1.** Crystal data and structure refinement for **1·tbe**, **2** and **2·tbe** at 100 K

| Identification code                         | <b>1·tbe</b>                                                             | <b>2</b>                                                                     | <b>2·tbe</b>                                                                 |
|---------------------------------------------|--------------------------------------------------------------------------|------------------------------------------------------------------------------|------------------------------------------------------------------------------|
| CCDC number                                 | <b>2094282</b>                                                           | <b>2094284</b>                                                               | <b>2094283</b>                                                               |
| Empirical formula                           | C <sub>8</sub> H <sub>14</sub> Br <sub>6</sub> N <sub>4</sub> Pt         | C <sub>12</sub> H <sub>20</sub> Br <sub>2</sub> N <sub>4</sub> Pt            | C <sub>14</sub> H <sub>22</sub> Br <sub>6</sub> N <sub>4</sub> Pt            |
| Formula weight                              | 840.78                                                                   | 575.23                                                                       | 920.90                                                                       |
| Temperature/K                               | 100(2)                                                                   | 100(2)                                                                       | 100(2)                                                                       |
| Crystal system                              | triclinic                                                                | orthorhombic                                                                 | triclinic                                                                    |
| Space group                                 | P-1                                                                      | Pbca                                                                         | P-1                                                                          |
| a/Å                                         | 7.2697(4)                                                                | 11.8704(11)                                                                  | 8.5098(4)                                                                    |
| b/Å                                         | 7.9781(4)                                                                | 8.3227(6)                                                                    | 8.6937(5)                                                                    |
| c/Å                                         | 9.4586(3)                                                                | 16.4831(12)                                                                  | 9.3226(4)                                                                    |
| $\alpha$ /°                                 | 100.930(4)                                                               | 90                                                                           | 112.221(5)                                                                   |
| $\beta$ /°                                  | 104.580(4)                                                               | 90                                                                           | 91.242(4)                                                                    |
| $\gamma$ /°                                 | 110.313(5)                                                               | 90                                                                           | 116.652(5)                                                                   |
| Volume/Å <sup>3</sup>                       | 474.14(4)                                                                | 1628.4(2)                                                                    | 555.17(6)                                                                    |
| Z                                           | 1                                                                        | 4                                                                            | 1                                                                            |
| $\rho_{\text{calc}}/\text{cm}^3$            | 2.945                                                                    | 2.346                                                                        | 2.754                                                                        |
| $\mu/\text{mm}^{-1}$                        | 28.603                                                                   | 13.517                                                                       | 24.527                                                                       |
| F(000)                                      | 378.0                                                                    | 1072.0                                                                       | 422.0                                                                        |
| Radiation                                   | Cu K $\alpha$<br>( $\lambda$ = 1.54184)                                  | Mo K $\alpha$<br>( $\lambda$ = 0.71073)                                      | Cu K $\alpha$<br>( $\lambda$ = 1.54184)                                      |
| 2 $\Theta$ range for data collection/°      | 10.148 to 140.63                                                         | 6.018 to 51.986                                                              | 10.536 to 152.364                                                            |
| Index ranges                                | -8 $\leq$ h $\leq$ 8,<br>-6 $\leq$ k $\leq$ 9,<br>-11 $\leq$ l $\leq$ 11 | -14 $\leq$ h $\leq$ 11,<br>-10 $\leq$ k $\leq$ 10,<br>-20 $\leq$ l $\leq$ 20 | -10 $\leq$ h $\leq$ 10,<br>-10 $\leq$ k $\leq$ 10,<br>-11 $\leq$ l $\leq$ 11 |
| Reflections collected                       | 3907                                                                     | 7919                                                                         | 9583                                                                         |
| Independent reflections                     | 1806<br>[R <sub>int</sub> = 0.0386,<br>R <sub>sigma</sub> = 0.0502]      | 1593<br>[R <sub>int</sub> = 0.0406,<br>R <sub>sigma</sub> = 0.0300]          | 2293<br>[R <sub>int</sub> = 0.0499,<br>R <sub>sigma</sub> = 0.0347]          |
| Data/restraints/parameters                  | 1806/0/90                                                                | 1593/0/88                                                                    | 2293/0/115                                                                   |
| Goodness-of-fit on F <sup>2</sup>           | 1.113                                                                    | 1.163                                                                        | 1.063                                                                        |
| Final R indexes [ $I \geq 2\sigma(I)$ ]     | R <sub>1</sub> = 0.0409,<br>wR <sub>2</sub> = 0.1102                     | R <sub>1</sub> = 0.0274,<br>wR <sub>2</sub> = 0.0624                         | R <sub>1</sub> = 0.0261,<br>wR <sub>2</sub> = 0.0641                         |
| Final R indexes [all data]                  | R <sub>1</sub> = 0.0469,<br>wR <sub>2</sub> = 0.1135                     | R <sub>1</sub> = 0.0366,<br>wR <sub>2</sub> = 0.0660                         | R <sub>1</sub> = 0.0282,<br>wR <sub>2</sub> = 0.0654                         |
| Largest diff. peak/hole / e·Å <sup>-3</sup> | 1.40/-2.42                                                               | 0.78/-1.44                                                                   | 1.53/-1.76                                                                   |

**Table S2.** Values of the Wiberg indices (WBI), Lagrangian kinetic energy  $G(r)$ , potential energy density  $V(r)$ , and energy density  $H(r)$  (Hartree) at the bond critical points (3, -1), corresponding to different noncovalent interactions in **1**·**tbe**.

| Adduct                      | HB         | Wiberg | sign( $\lambda_2\rho$ ) | $G(r)$ | $V(r)$ | Energy density |
|-----------------------------|------------|--------|-------------------------|--------|--------|----------------|
| ( <b>1</b> )·(tbe) (type 1) | H2A···Br1A | 0.00   | -0.006                  | 0.004  | -0.003 | 0.001          |
| ( <b>1</b> )·(tbe) (type 1) | H2A···Br2A | 0.00   | -0.004                  | 0.002  | -0.002 | 0.000          |
| ( <b>1</b> )·(tbe) (type 1) | H1A···Br1  | 0.01   | -0.011                  | 0.006  | -0.005 | 0.001          |
| ( <b>1</b> )·(tbe) (type 2) | H3B···Br2A | 0.00   | -0.004                  | 0.002  | -0.002 | 0.000          |
| ( <b>1</b> )·(tbe) (type 2) | H3C···Br1A | 0.00   | -0.005                  | 0.003  | -0.002 | 0.001          |
| ( <b>2</b> )·(tbe) (type 1) | H6B···Br1A | 0.00   | -0.007                  | 0.004  | -0.004 | 0.000          |
| ( <b>2</b> )·(tbe) (type 1) | H6B···Br2A | 0.00   | -0.005                  | 0.003  | -0.002 | 0.001          |
| ( <b>2</b> )·(tbe) (type 2) | H2A···Br2A | 0.00   | -0.005                  | 0.003  | -0.003 | 0.000          |
| ( <b>2</b> )·(tbe)(type 2)  | H2B···Br1A | 0.00   | -0.005                  | 0.003  | -0.003 | 0.000          |

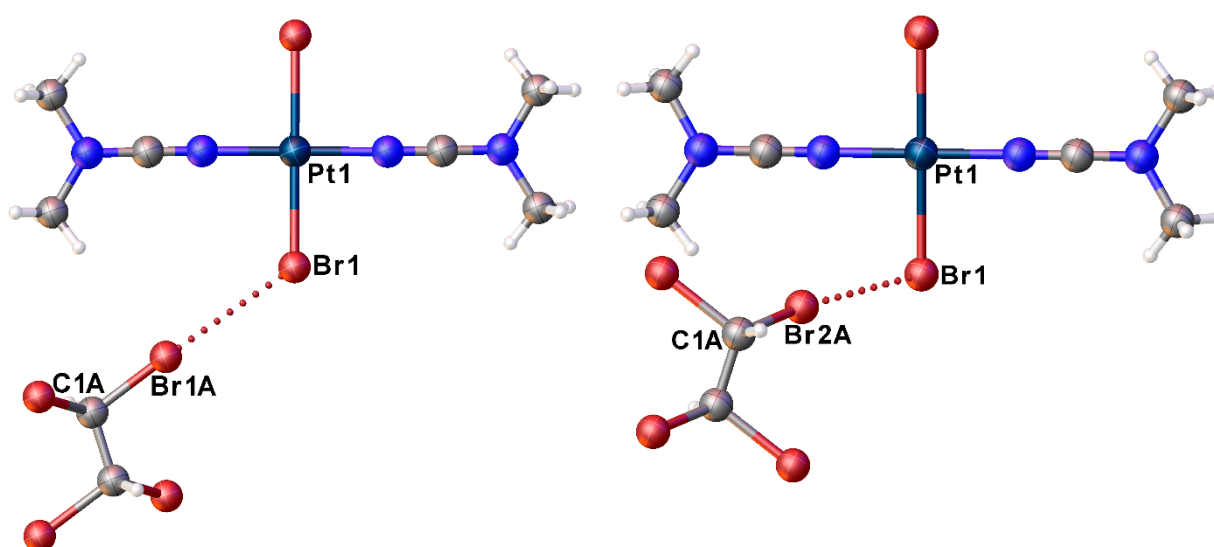

**Figure S9.** Structure of cluster **1**·**tbe** (halogen bonding)

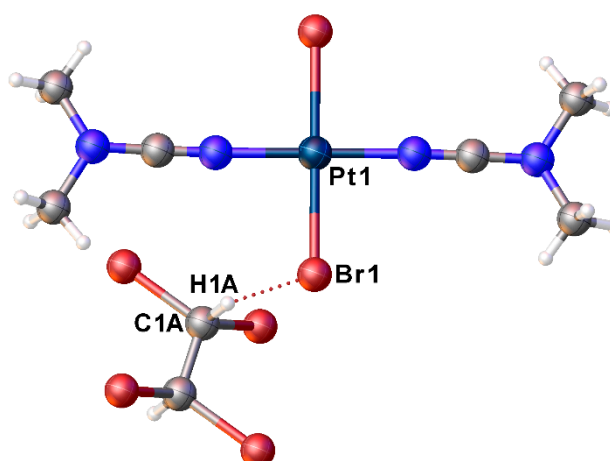

**Figure S10.** Structure of cluster **1**·**tbe** (hydrogen bonding)

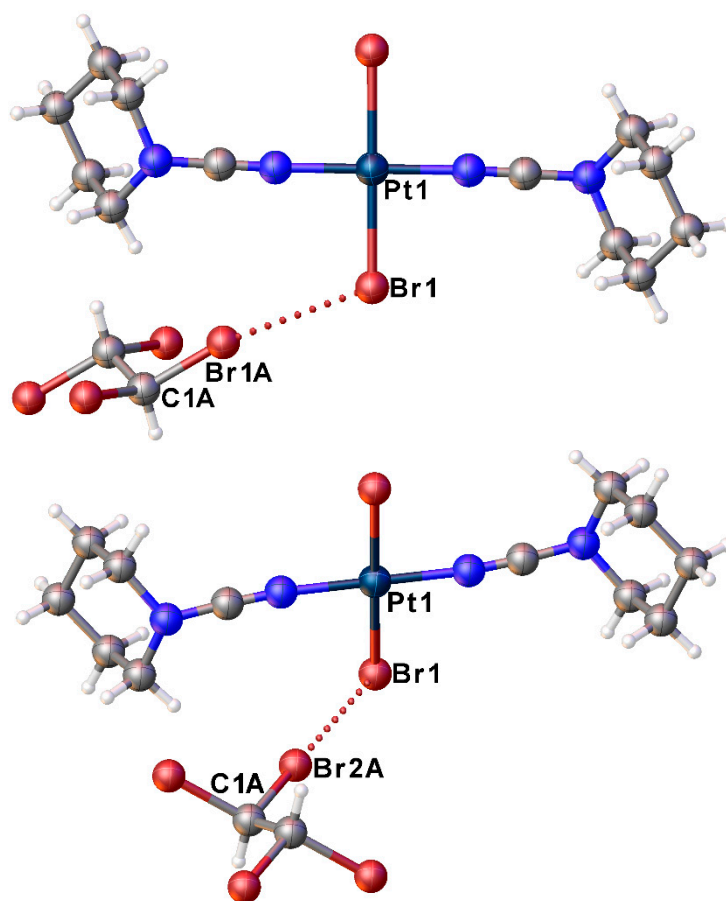

**Figure S11.** Structure of cluster **2·tbe** (halogen bonding)
